# Supplementary material
Source: Springer Nature journal article supplement (https://www.springermedizin.de/resource/supplementary/12885_2011_3019_MOESM10_ESM.pdf/9462500)

Figure 7

A

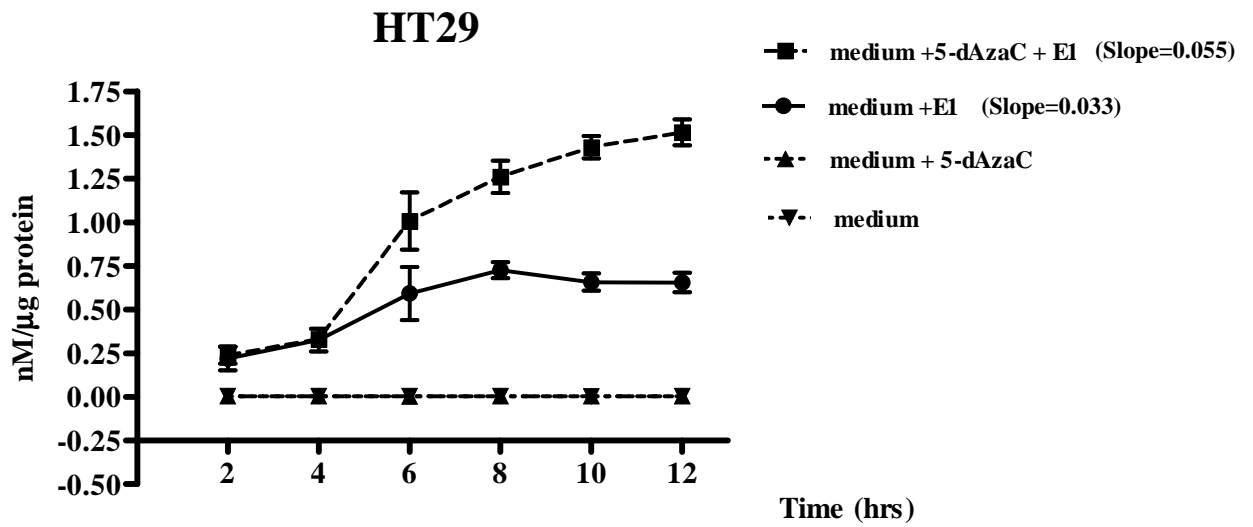

B

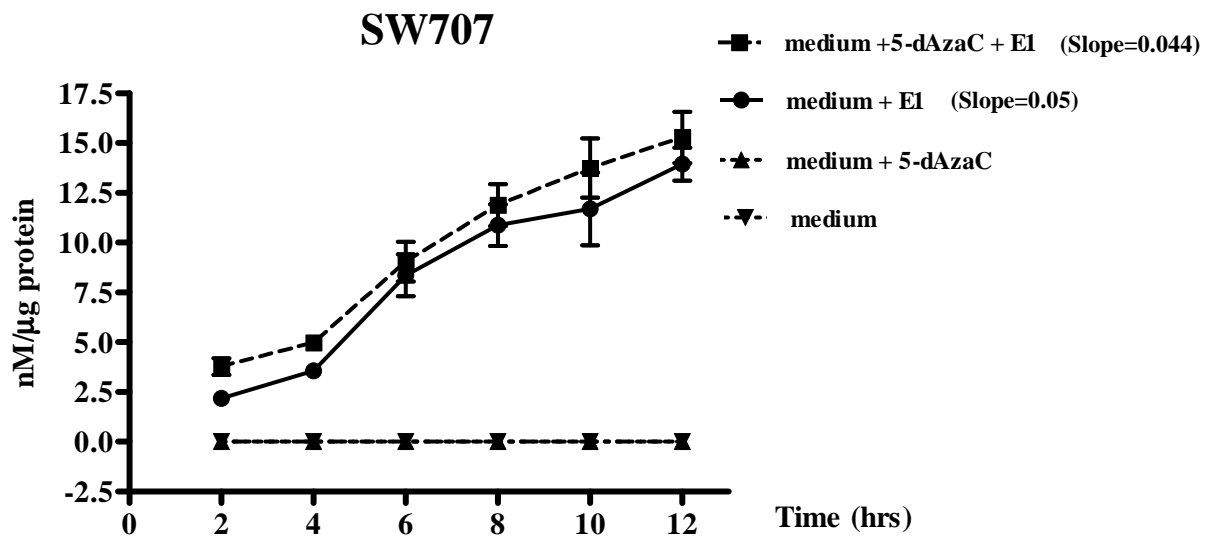

Supplement: MOESM10 [file 9462500]
